# Supplementary material
Source: PubMed Central journal article supplement (PMC5624311)
Supplement: NIHMS855194-supplement-Supplemental_Table_1.pdf [file NIHMS855194-supplement-Supplemental_Table_1.pdf]

Online Resource 1. *Bivariate correlations between coder ratings and self-ratings for the On Your Mind Writing Task (N = 117).*

|                                   | <u>Coder-rated OYM characteristics</u> |            |             |             |
|-----------------------------------|----------------------------------------|------------|-------------|-------------|
|                                   | Negative                               | Other      | Searching   | Means (SD)  |
| Means (SD)                        | 3.57 (1.11)                            | 1.97 (.75) | 2.45 (1.06) |             |
| <u>Self-rated characteristics</u> |                                        |            |             |             |
| difficult to control              | .32**                                  | -.02       | .12         | 4.54 (1.54) |
| negative                          | .66***                                 | .14        | .05         | 4.27 (1.94) |
| unhelpful                         | .43***                                 | .12        | -.01        | 3.95 (1.76) |
| disrupt concentration             | .18*                                   | .12        | .06         | 3.09 (1.60) |
| prolonged                         | .27**                                  | .24*       | -.04        | 2.93 (1.33) |
| frequent                          | -.08                                   | -.08       | .12         | 2.34 (1.31) |
| about self                        | -.09                                   | -.52***    | .05         | 4.95 (1.96) |
| no shift in perspective           | -.16                                   | -.14       | -.23*       | 3.70 (1.66) |
| unresolved                        | .43***                                 | .09        | .38***      | 5.07 (1.76) |
| uncertain                         | .20*                                   | -.15       | .53***      | 4.23 (2.02) |
| about something important         | .15                                    | -.10       | .08         | 6.14 (1.22) |
| Positive Affect                   | -.51***                                | -.16       | -.10        | 2.51 (.92)  |
| Fear                              | .44***                                 | -.19*      | .08         | 2.39 (1.02) |
| Hostility                         | .54***                                 | .22*       | -.15        | 1.89 (.92)  |
| Self-Conscious Affect             | .51***                                 | -.04       | -.01        | 2.16 (1.10) |
| Sadness                           | .51***                                 | .17        | .03         | 2.34 (1.18) |
| <u>Rumination</u>                 |                                        |            |             |             |
| ARS                               | .29**                                  | .12        | -.11        |             |
| RSQ                               | .28**                                  | .14        | .14         |             |
| ARQ                               | .28**                                  | -.04       | -.02        |             |
| SRRS                              | .22*                                   | .10        | -.07        |             |
| RIO                               | .23*                                   | .27**      | -.05        |             |
| PEPQ-R                            | .30**                                  | .18        | .04         |             |

\* $p < .05$ , \*\* $p < .01$ , \*\*\* $p < .001$

Note: OYM = On Your Mind writing task; Negative = Negative-valence (vs Positive-valence); Other = Other-focus (vs Self-focus); Searching purpose (vs Solving purpose); ARS = Anger Rumination Scale; RSQ = Response Styles Questionnaire; ARQ = Anxious Rumination Questionnaire; SRRS = Stress-Reactive Rumination Scale; RIO = Rumination on Interpersonal Offenses Scale; PEPQ-R = Post-Event Processing Questionnaire.
